# Supplementary material
Source: MDPI journal article supplement (https://www.mdpi.com/2673-9976/9/1/11)

# Phenolics compounds from Amaranthaceae family: extraction and biological properties

B. Nuñez-Estevez <sup>1,2</sup>, T. C. Finimundy <sup>2</sup>, M. Carpena <sup>1</sup>, Paz Otero <sup>1</sup>, M. Barral-Martinez <sup>1</sup>, T. C. S. Pires <sup>2</sup>, R. Calhelha <sup>2</sup>, P. Garcia-Perez <sup>1</sup>, J. Simal-Gandara <sup>1</sup>, I.C.F.R. Ferreira <sup>2</sup>, M.A. Prieto <sup>1,2,\*</sup> and L. Barros <sup>2,\*</sup>

<sup>1</sup>Nutrition and Bromatology Group, Faculty of Food Science and Technology, University of Vigo, Ourense Campus, E32004 Ourense, Spain.

<sup>2</sup>Centro de Investigação de Montanha (CIMO), Instituto Politécnico de Bragança, Campus de Santa Apolónia, 5300-253 Bragança, Portugal.

\*mprieto@uvigo.es; \*lillian@ipb.pt

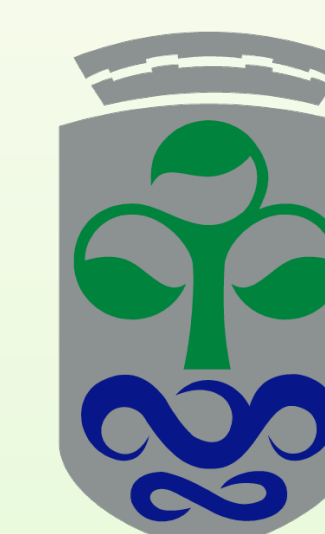

UNIVERSIDADE DE VIGO

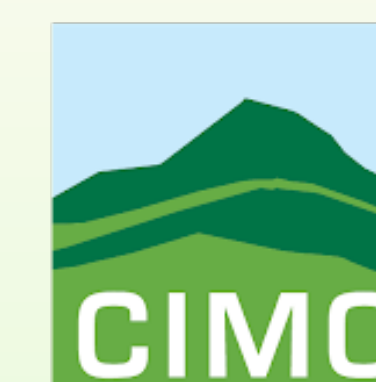

Centro de Investigação de Montanha

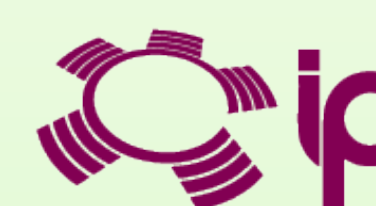

INSTITUTO POLITÉCNICO DE BRAGANÇA

## Abstract

Species of the Amaranthaceae family have become a potential group of plants for their latent beneficial properties. Their use in traditional medicine and potential biological properties can be considered as the basis to guide further investigations about their characteristics and beneficial uses. In this work, three species of the Amaranthaceae family traditional from China (*Alternanthera sessilis* L., *Dicliptera chinensis* L. and *Dysphania ambrosioides* L.) were proposed as an alternative source of bioactive compounds, namely phenolic compounds (Adegbola et al., 2020).

The study was aimed to extract and characterize the phenolic compounds of the three species and search for possible cytotoxic and antimicrobial activities. For this purpose, the antimicrobial activity was tested against Gram (-), Gram (+) pathogenic bacteria. The antitumor properties were assessed on *in vitro* studies to assess the inhibition of the growth of several tumor cell lines. Thus, Amaranthaceae family could be an alternative source of bioactive compounds to formulate new innovative products and incorporate them into the food, cosmetic and pharmaceutical industry.

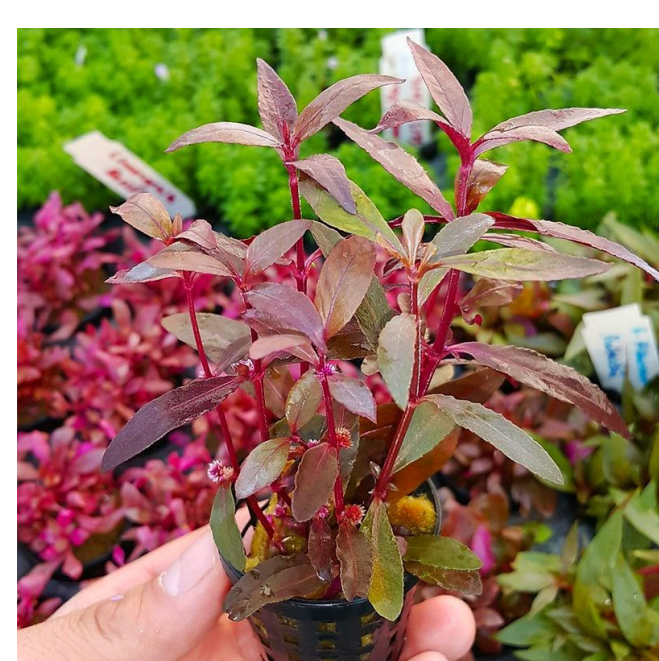

*Alternanthera sessilis*

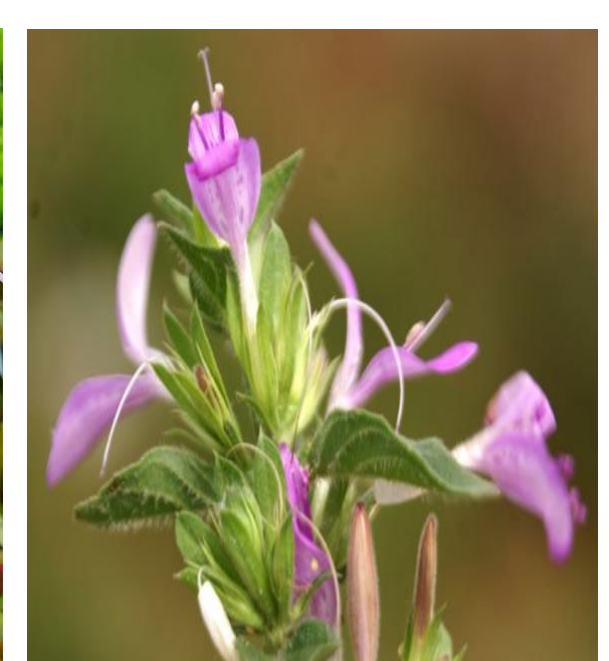

*Dicliptera chinensis*

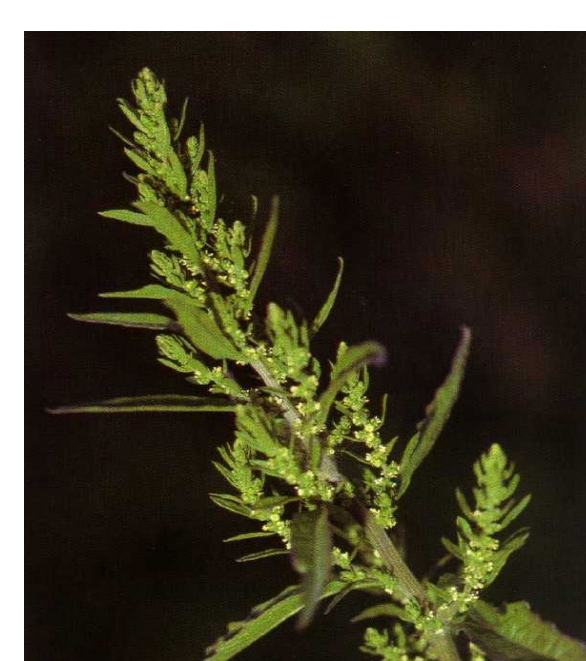

*Dysphania ambrosioides*

## Introduction

The search of new bioactive compounds to produce drugs is a necessity promoted by the increase of resistant bacteria, new viruses and numerous pathologies without treatment. The production of drugs produced, in 2016, 250 billion euros, data that situates the pharmaceutical industry in one of the most rentable markets. One of the most used sources of bioactive compounds are the natural products. Since 1981 was approved 1881 new drugs of which the 25% came from natural sources and the 41.9% came from no synthetic sources (McKerrow, 2015) (Figure 1).

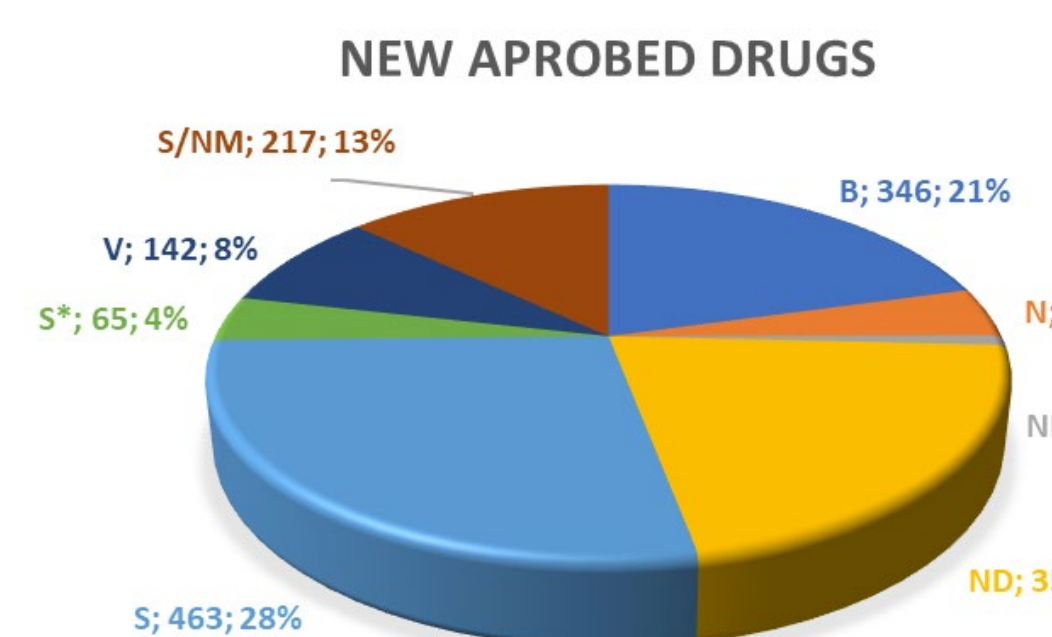

Figure 1. Drugs approved since 1981 (n = 1881) classified by their source. B: biological macromolecule, N: unaltered natural product, NB: botanical drug, ND: natural product derivative, S: synthetic drug, S\*: Synthetic drug (NP pharmacophore), V: vaccine, S/NM: mimic of natural products.

One of the biggest sources of natural drugs is the secondary metabolites of the plants. Inside this big group, phenolic compounds are the most important for their bioactivities, diversity and abundance. The three species under study have been present in the diets of Asian and middle East countries. Moreover, these plants have been used in traditional medicine to treat different pathologies an illness (skin diseases, ocular diseases, wound healing, animal bites etc.). This use could be a clue of the presence of bioactive compounds. Therefore, this work consisted in the identification of the phenolic compounds present in the species and their bioactivities.

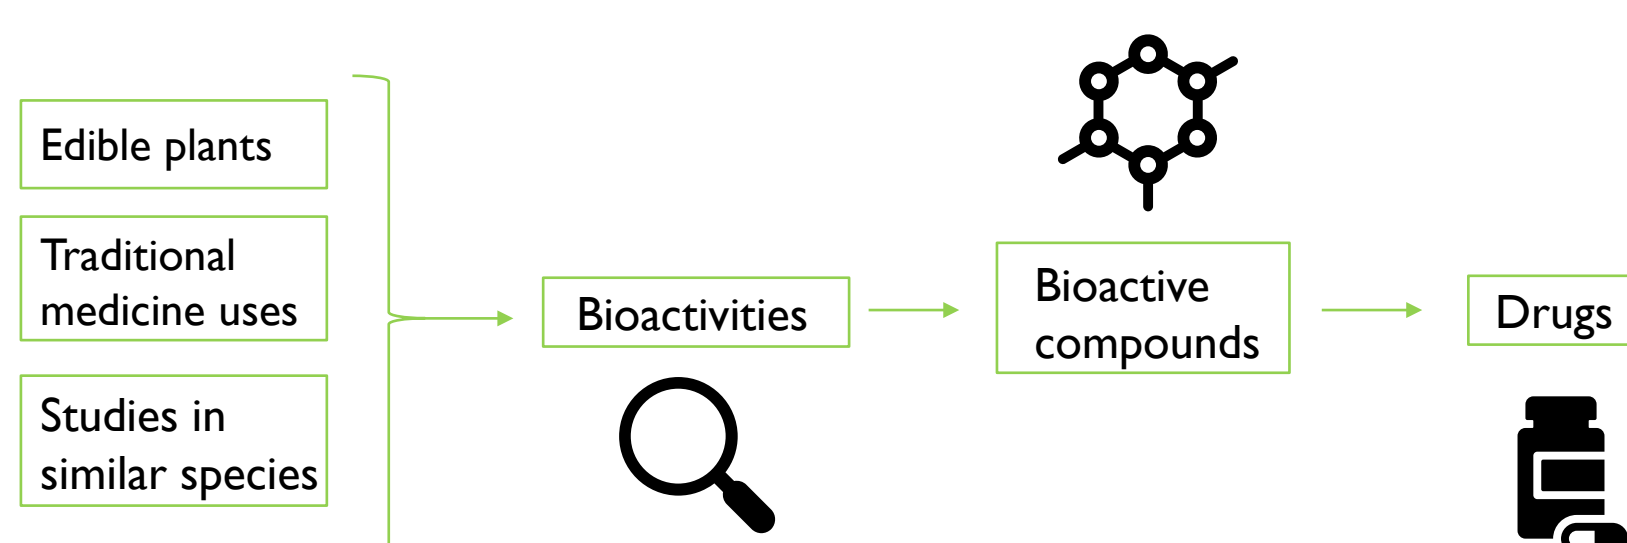

## Methodology

This work can be separated in three sections. First of all, was made the extraction of the phenolic compounds by maceration. The result of this step is a dry extract ready to continue with the biological activities.

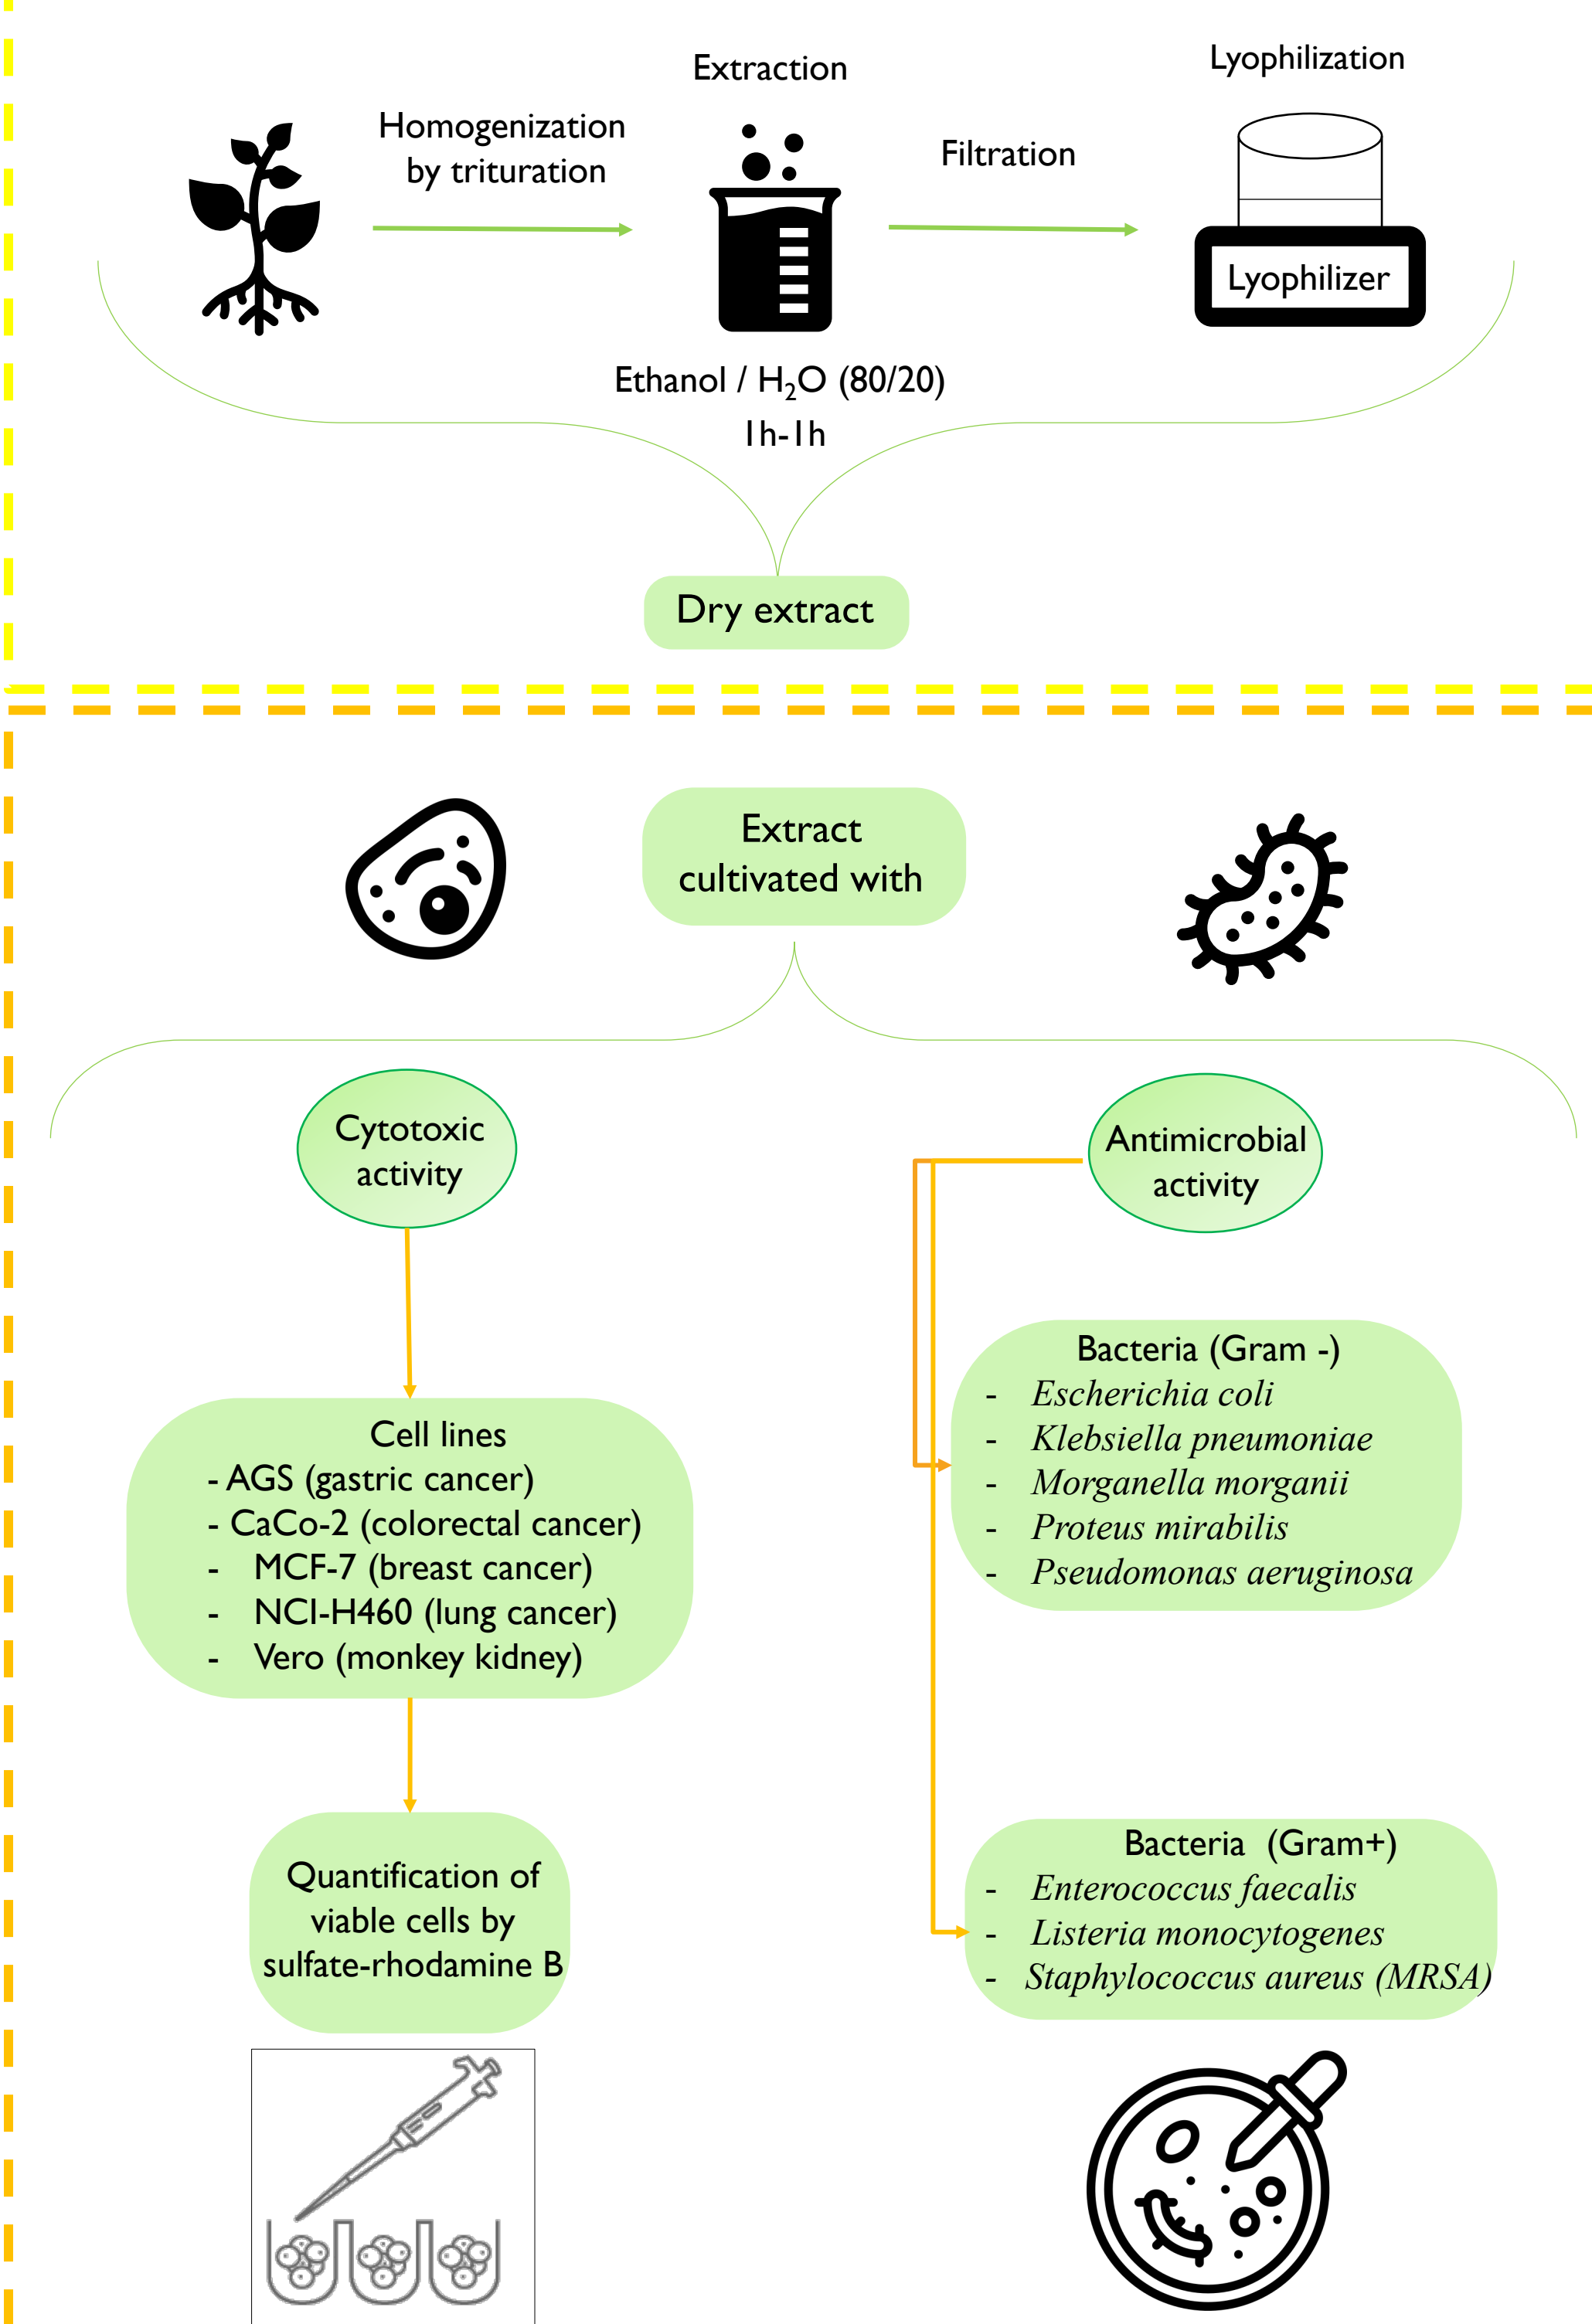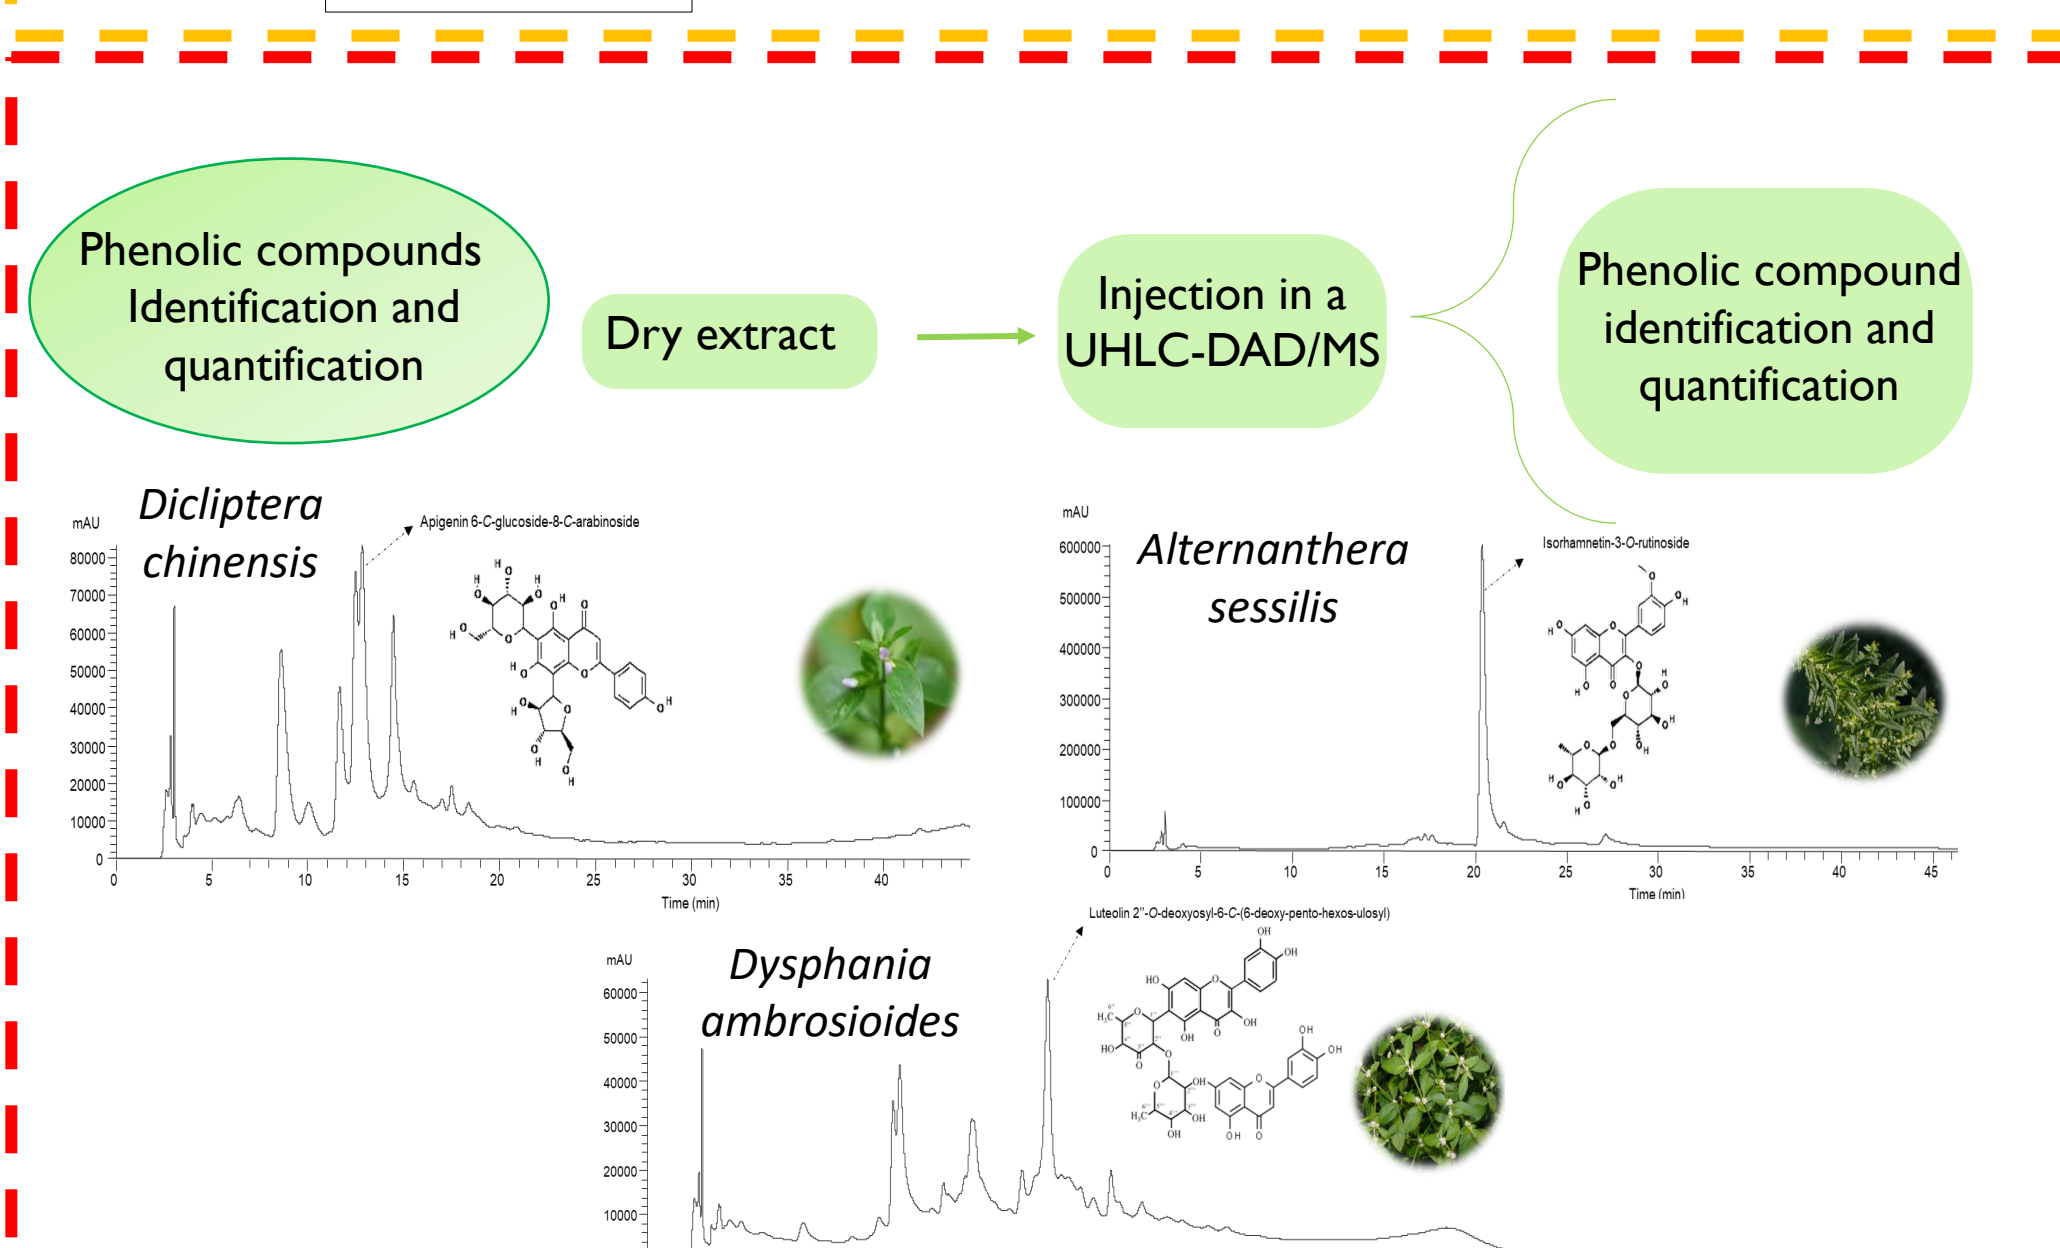

## Results

The data obtained showed interesting results in the cytotoxic (Table 1) and antimicrobial activity (Table 2). Moreover, in Table 3 is represented all the compounds identified and their concentration in the samples.

Table 1. The cytotoxic (GI<sub>50</sub> µg/mL) activities.

| Cell Lines | <i>D. chinensis</i> | <i>A. sessilis</i> | <i>D. ambrosioides</i> |
|------------|---------------------|--------------------|------------------------|
| Caco-2     | >400                | >400               | 188±14                 |
| MCF-7      | >400                | >400               | 245±13                 |
| NCI-H460   | >400                | >400               | 263±12                 |
| AGS        | >400                | >400               | 263±22                 |
| Vero       | >400                | >400               | >400                   |

Table 2. The antimicrobial activity expressed in MIC and MBC (mg/mL) of the different microorganism tested.

| Antimicrobial activity        | <i>Dicliptera chinensis</i> |     | <i>Alternanthera sessilis</i> |     | <i>Dysphania ambrosioides</i> |     |
|-------------------------------|-----------------------------|-----|-------------------------------|-----|-------------------------------|-----|
|                               | MIC                         | MBC | MIC                           | MBC | MIC                           | MBC |
| Gram-negative bacteria        |                             |     |                               |     |                               |     |
| <i>Escherichia coli</i>       | 20                          | >20 | 10                            | >20 | 10                            | >20 |
| <i>Klebsiella pneumoniae</i>  | >20                         | >20 | 20                            | >20 | >20                           | >20 |
| <i>Morganella morganii</i>    | 10                          | >20 | 5                             | >20 | 5                             | >20 |
| <i>Proteus mirabilis</i>      | >20                         | >20 | >20                           | >20 | >20                           | >20 |
| <i>Pseudomonas aeruginosa</i> | >20                         | >20 | >20                           | >20 | >20                           | >20 |
| Gram-positive bacteria        |                             |     |                               |     |                               |     |
| <i>Enterococcus faecalis</i>  | 10                          | >20 | 20                            | >20 | 10                            | >20 |
| <i>Listeria monocytogenes</i> | 10                          | >20 | >20                           | >20 | 10                            | >20 |
| MRSA                          | 10                          | >20 | 5                             | >20 | 10                            | >20 |

Table 3 Tentative identification of the phenolic profile and their quantification (mg/g of dry extract).

| RT    | Tentative identification                                      | <i>D. chinensis</i> | <i>A. sessilis</i> | <i>D. ambrosioides</i> |
|-------|---------------------------------------------------------------|---------------------|--------------------|------------------------|
| 4.88  | 3-p-Coumaroylquinic acid                                      | 1.2±0.1             | nd                 | nd                     |
| 6.40  | p-Coumaroyl pentoside acid                                    | nd                  | 0.33±0.01          | nd                     |
| 6.66  | Caffeic acid acetylhexoside                                   | nd                  | 0.75±0.04          | nd                     |
| 6.87  | Sulfo-caffeic acid                                            | 1.17±0.05           | nd                 | nd                     |
| 8.59  | Luteolin-6-C-glucoside-7-O-glucoside                          | nd                  | 0.31±0.02          | nd                     |
| 8.61  | Apigenin-6,8-di-C-glucoside (vicenin-2)                       | 2.0±0.1             | nd                 | nd                     |
| 10.10 | Luteolin-6-C-hexosyl-8-C-pentosyl                             | 0.606±0.004         | nd                 | nd                     |
| 11.30 | Quercetin-3-O-glucosyl-pentoside-7-O-glucuronide              | nd                  | 0.535±0.01         | nd                     |
| 11.70 | Apigenin-6-C-xyloside-8-C-glucoside                           | 1.3±0.1             | nd                 | nd                     |
| 12.50 | Apigenin 2"-O-xyloside-8-C-hexoside                           | 1.9±0.1             | nd                 | nd                     |
| 12.80 | Dihydroxyl methyl quercetin-chalcone                          | nd                  | 0.56±0.01          | nd                     |
| 12.81 | Apigenin 6-C-glucoside-8-C-arabinoside (Schafoside)           | 2.40±0.04           | nd                 | nd                     |
| 13.60 | Luteolin 2"-O-deoxyhexosyl-6-C-glucoside                      | nd                  | 0.59±0.04          | nd                     |
| 13.84 | 5-Hydroxy-3,4',7' trimethoxy-flavone                          | nd                  | nd                 | 0.93±0.01              |
| 13.92 | Luteolin-6-C-glucoside                                        | nd                  | 1.6±0.1            | nd                     |
| 14.53 | Apigenin-6-C-glucoside-8-C-arabinoside                        | 2.0±0.1             | nd                 | nd                     |
| 15.20 | Eriodictyol-O-glucuronide                                     | nd                  | nd                 | 0.001±0.00002          |
| 15.45 | Isorhamnetin-3-O-neohesperidoside                             | nd                  | nd                 | 1.13±0.01              |
| 16.30 | Luteolin 2"-O-deoxyhexosyl-C-pentoside                        | nd                  | 0.247±0.004        | nd                     |
| 16.31 | Kaempferol dirhamnoside-O-hexoside                            | nd                  | nd                 | 0.98±0.05              |
| 16.57 | Quercetin-3-O-rutinoside                                      | nd                  | 0.56±0.01          | 0.721±0.002            |
| 16.94 | Lignan-O-coumaroylglucoside                                   | nd                  | nd                 | 0.337±0.005            |
| 17.01 | Apigenin 6-C-pentosyl-8-C-hexoside                            | 0.35±0.01           | nd                 | nd                     |
| 17.26 | Quercetin-O-rhamnosyl-pentoside                               | nd                  | nd                 | 0.888±0.001            |
| 17.30 | Apigenin-6-C-glucoside                                        | nd                  | 0.168±0.02         | nd                     |
| 17.50 | Apigenin-6-C-hexoside-8-C-rhamnoside                          | 0.32±0.02           | nd                 | nd                     |
| 17.52 | Chrysoeriol-8-C-(2-rhamnosyl)hexoside                         | nd                  | 0.01±0.002         | nd                     |
| 17.59 | Kaempferol-O-rhamnosyl-O-pentoside                            | nd                  | nd                 | 0.848±0.01             |
| 17.90 | Kaempferol-O-rhamnoside-O-hexoside                            | nd                  | 0.77±0.02          | nd                     |
| 18.00 | Kaempferol-O-rhamnoside-O-hexoside                            | nd                  | 0.93±0.01          | nd                     |
| 18.12 | Isorhamnetin-3-O-neohesperidoside                             | nd                  | nd                 | 0.68±0.003             |
| 18.40 | Apigenin-8-C-rhamnoside-6-C-glucoside                         | nd                  | 0.23±0.02          | nd                     |
| 18.42 | Apigenin-6-C-arabinoside-8-C-glucoside                        | 0.28±0.02           | nd                 | nd                     |
| 19.00 | Luteolin-7-O-neohesperoside                                   | nd                  | 0.73±0.05          | nd                     |
| 19.75 | Luteolin-7-O-rhamnosyl-(1→2)hexoside                          | nd                  | nd                 | 0.67±0.01              |
| 19.90 | Apigenin-6-C-glucoside-8-C-xyloside                           | 0.08±0.01           | nd                 | nd                     |
| 20.00 | Luteolin-O-rutinoside                                         | nd                  | 0.747±0.02         | nd                     |
| 20.37 | Isorhamnetin-3-O-rutinoside                                   | nd                  | nd                 | 5.75±0.04              |
| 20.60 | Luteolin 2"-O-deoxyhexosyl-6-C-(6-deoxy-pentohexoside-ulosyl) | nd                  | 0.705±0.04         | nd                     |
| 20.61 | Methyl-luteolin 2"-O-deoxyhexosyl-6-C-hexoside                | nd                  | 0.8±0.1            | nd                     |
| 21.53 | Kaempferol-O-rhamnosyl-O-pentoside                            | nd                  | nd                 | 0.587±0.002            |
| 22.10 | Luteolin-8-C-(rhamnosyl)ketodeoxyhexoside                     | nd                  | 2.02±0.04          | nd                     |
| 22.80 | Luteolin-8-C-(rhamnosyl)ketodeoxyhexoside                     | nd                  | 0.29±0.01          | nd                     |
| 23.20 | Luteolin-O-deoxyhexosyl-C-deoxy-pento-hexosulosyl             | nd                  | 1.0±0.1            | nd                     |
| 23.80 | Luteolin-O-deoxyhexosyl-C-deoxy-pento-hexosulosyl             | nd                  | 0.916±0.003        | nd                     |
| 24.60 | Apigenin-6-C-glucoside-2"-O-rhamnoside                        | nd                  | 0.42±0.01          | nd                     |
| 24.67 | Kaempferol-O-hexose-O-gallic acid                             | nd                  | nd                 | 0.707±0.003            |
| 25.50 | Apigenin-4'-O-hexoside-D-deoxyhexoside                        | nd                  | 0.90±0.01          | nd                     |
| 27.11 | Acetylated luteolin pentosyl-rhamnoside                       | nd                  | nd                 | 0.81±0.02              |
|       | <b>Total Phenolic compounds</b>                               | <b>13.7±0.5</b>     | <b>16±1</b>        | <b>15.0±0.1</b>        |

## Conclusion

The results showed significant results in antimicrobial and cytotoxic activity.

The antimicrobial activity is not strong enough to think in a father investigation in terms of search a possible antibiotic in this species. Nevertheless, the MIC of *Dicliptera chinensis* and *Alternanthera sessilis* are interesting to use these extracts as a possible natural food preservative that could increase the shelf life of the food thanks to the inhibition of microbial growth.

*Dysphania ambrosioides* present a low IC<sub>50</sub> against CaCo, MCF-7 and NCI-H460 cell lines. This activity could be useful for find new bioactive compounds for new treatments against different cancers.

Further investigations are needed to complete this study and found what are the compounds in this species that give to this species their biologic activities.

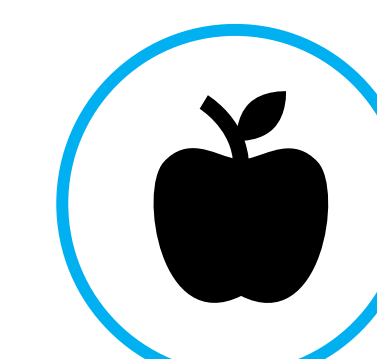

Protection

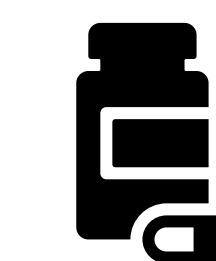

New anticancer treatments

## References

- Adegbola, P. I., Adetutu, A., & Olaniyi, T. D. (2020). Antioxidant activity of *Amaranthus* species from the Amaranthaceae family – A review. *South African J. Bot.*, 133, 111–117.
- McKerrow, J. H. (2015). Recognition of the role of Natural Products as drugs to treat neglected tropical diseases by the 2015 Nobel prize in physiology or medicine. *Nat. Prod. Rep.*, 32, 1610–1611.

## Acknowledgements

The research leading to these results was funded by Xunta de Galicia supporting the Axudas Conecta Peme, the IN852A 2018/58 NeuroFood Project and the program EXCELENCIA-ED431F 2020/12; to Ibero-American Program on Science and Technology (CYTED—AQUA-CIBUS, P317RT0003) and to the Bio Based Industries Joint Undertaking (JU) under grant agreement No 888003 UP4HEALTH Project (H2020-BBI-JTI-2019); by MICINN supporting the Ramón y Cajal grant for M.A. Prieto (RYC-2017-22891); by EcoChestnut Project (Erasmus+ KA202) that supports the work of B. Nuñez-Estevez. The JU receives support from the European Union's Horizon 2020 research and innovation program and the Bio Based Industries Consortium. The project SYSTEMIC Knowledge hub on Nutrition and Food Security, has received funding from national research funding parties in Belgium (FWO), France (INRA), Germany (BLE), Italy (MIPAAF), Latvia (IZM), Norway (RCN), Portugal (FCT), and Spain (AEI) in a joint action of JPI HDHL, JPI-OCEANS and FACCE-JPI launched in 2019 under the ERA-NET ERA-HDHL (n° 696295). Foundation for Science and Technology (FCT, Portugal) for financial support through national funds FCT/MCTES to the CIMO (UIDB/00690/2020). L. Barros and R. Calhelha thank the national funding by FCT, P.I., through the institutional scientific employment program-contract for their contracts.

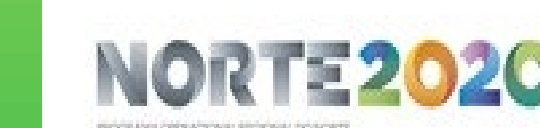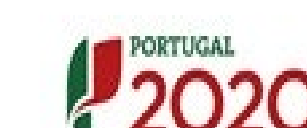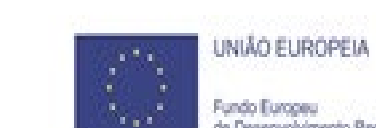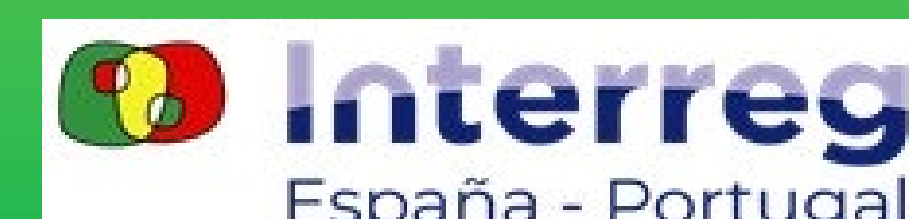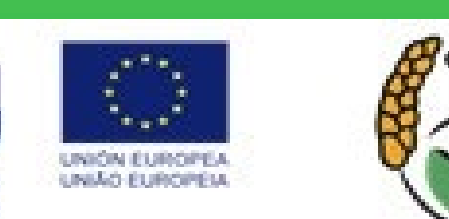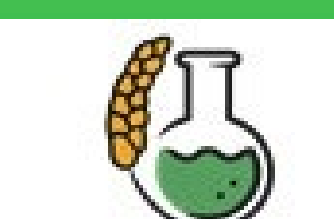

Supplement: s1 [file s1]
